# Supplementary material
Source: PubMed Central journal article supplement (PMC3592017)

Wang et al., Figure S2.

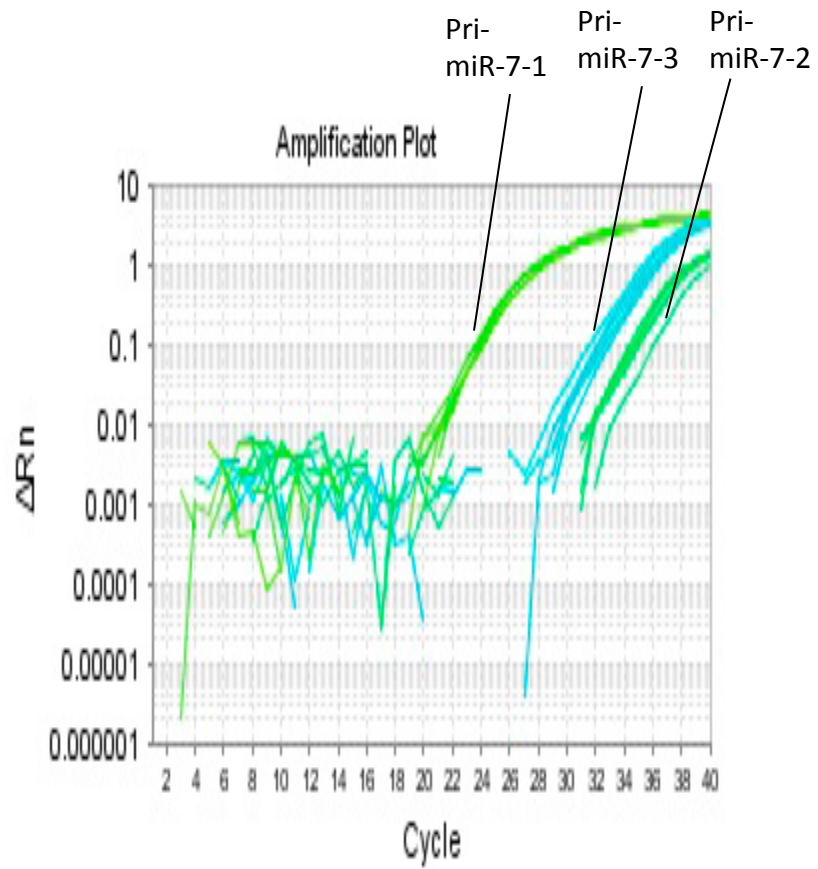

|       | Pri-miR-7-1 | Pri-miR-7-2 | Pri-miR-7-3 |
|-------|-------------|-------------|-------------|
|       | Ct mean     | Ct mean     | Ct mean     |
| siCTL | 25.4184     | 35.48902    | 35.30671    |
| siQKI | 25.00673    | 36.02834    | 35.5612     |

Wang et al., Figure S3.

A

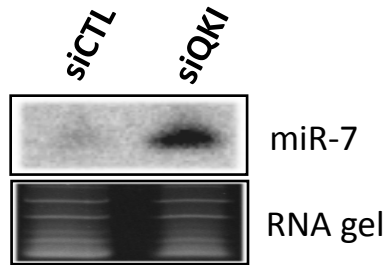

B

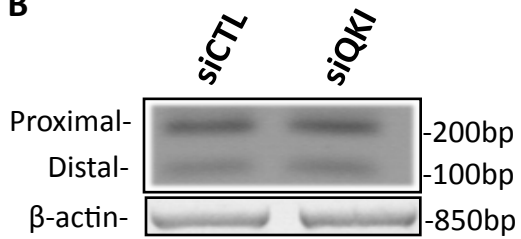

| U343                | siCTL | siQKI |
|---------------------|-------|-------|
| Proximal/<br>Distal | 2.639 | 2.363 |

Wang et al., Figure S4.

**A**

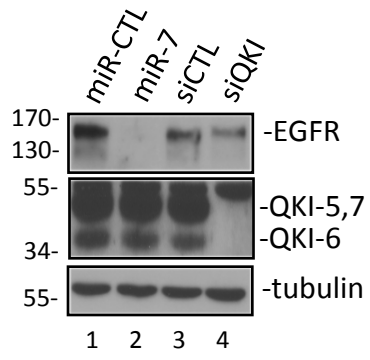

**B**

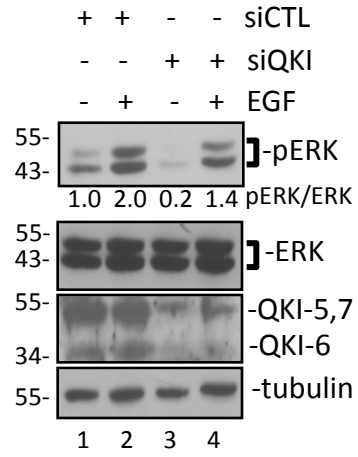

Wang et al., Figure S5.

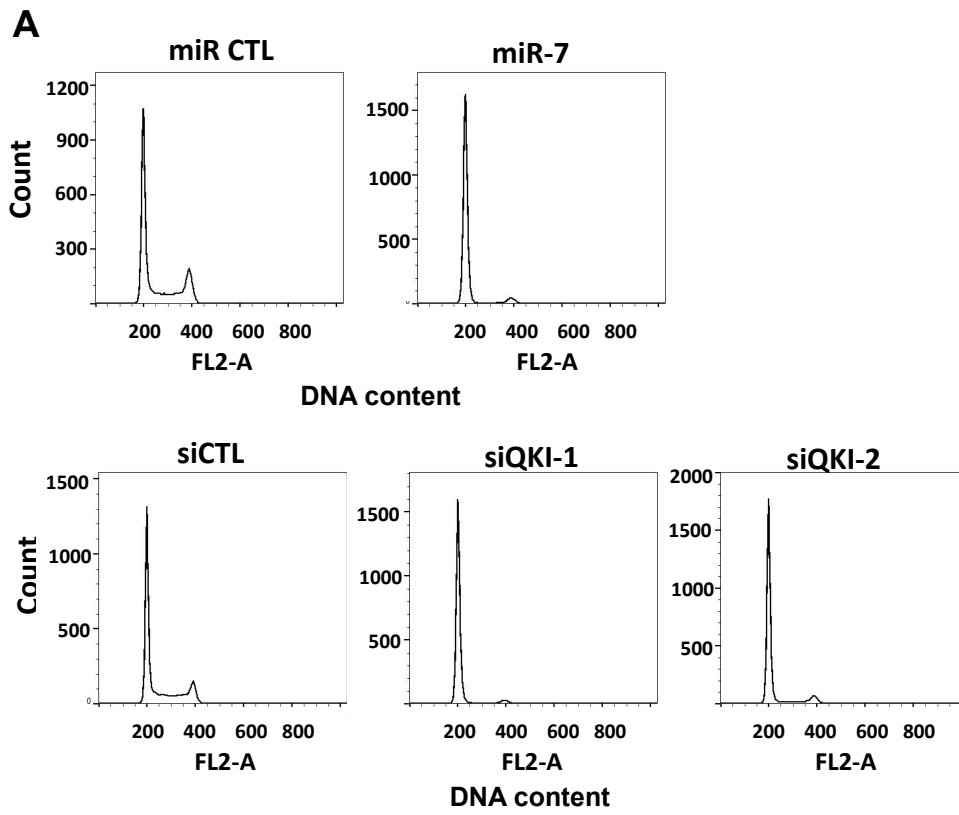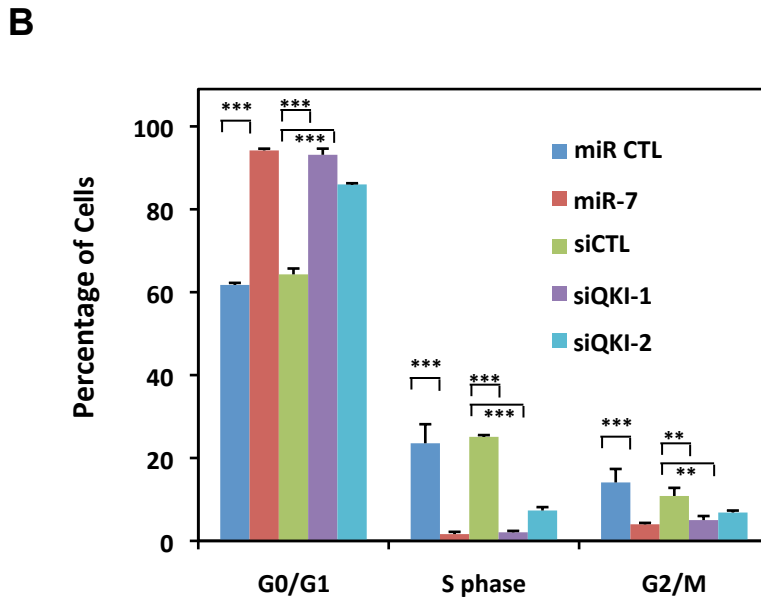

Supplement: MCB.01604-12_zmb999109889so2.pdf [file MCB.01604-12_zmb999109889so2.pdf]
